# Supplementary material
Source: ML conference proceedings conference paper supplement (https://openaccess.thecvf.com/content/CVPR2025/html/Yang_HuPerFlow_A_Comprehensive_CVPR_2025_paper.html)
Supplement: Supplementary file 1 [file Yang_HuPerFlow_A_Comprehensive_CVPR_2025_supplemental.zip]

# HuPerFlow: A Comprehensive Benchmark for Human vs. Machine Motion Estimation Comparison

## Supplementary Material

**Appendix 1 Frame onset errors.** In online psychophysical experiments on motion perception, presenting motion stimuli with precise onset timing is essential. Due to varying display configurations across devices, especially with refresh rates spanning 30 to 120 Hz and adaptive refresh rate (ARR) features on some modern devices, adjustments from typical offline experiments were required. To accommodate these differences without imposing strict device requirements, we presented visual stimuli at 30 Hz (33.33 ms per frame) and controlled frame onset timing using the `Clock.getTime` function in PsychoPy. To assess device stability among participants, frame drops and frame onset times were logged. Since each trial included at least three repetitions with varying lengths, we recorded every frame of image presentation only during the third repetition of each trial in the main experiment (see the Procedure section). Fig. S1 shows the distribution of frame onset errors, calculated as deviations from ideal frame onsets (e.g., 33.33 ms, 66.67 ms). The frame drop rate was 0.041%, and the average frame onset error was -0.055 ms (SD = 3.664 ms), indicating consistent and accurate visual stimulus presentation across devices.

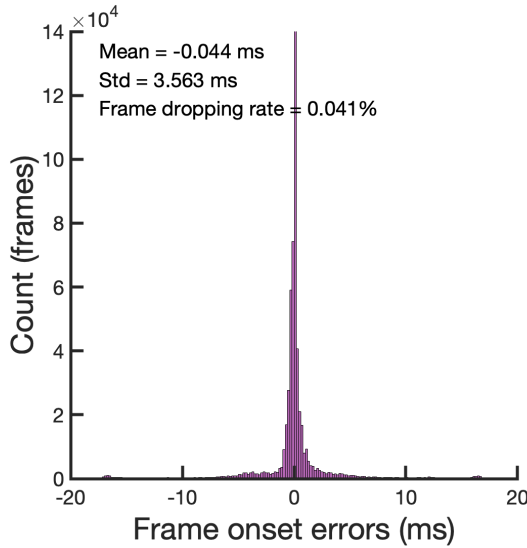

Figure S1. Distribution of frame onset errors

**Appendix 2 Correlations between human responses and ground truth.** Fig. S2 presents scatter plots comparing

human responses to ground truth data across each dataset. Each point represents the average response from the same locations across four repetitions within an observer.

**Appendix 3 Response Consistency Index (RCI).** Response Consistency Index (RCI) is an index from [47] to evaluate the similarity between model performance and human flow illusions at each probed location.

The RCI is defined as the product of  $A \cdot B \cdot C$  in Equations S1, S2, and S3, measuring the relative alignment of ground truth ( $G$ ), human response ( $R$ ), model prediction ( $M$ ), and the origin ( $O$ ).

- $A$  (Equation S1) quantifies the deviation of human responses from the ground truth.
- $B$  (Equation S2) indicates the directional similarity between the response error vector  $\vec{GR}$  and the model error vector  $\vec{GM}$  relative to the ground truth.
- $C$  (Equation S3) compares the distance between model prediction and ground truth  $\|\vec{GM}\|$  with the distance between model prediction and response  $\|\vec{RM}\|$ .

The RCI approaches +1 when the model's prediction aligns closely with human flow illusions and approaches -1 when the prediction diverges in the opposite direction.

$$A = \frac{\|\vec{GR}\|}{\|\vec{OG}\| + \|\vec{OR}\|}. \quad (S1)$$

$$B = \frac{\vec{GR} \cdot \vec{GM}}{\|\vec{GR}\| \|\vec{GM}\|}. \quad (S2)$$

$$C = 0.5 \left( \frac{\|\vec{GM}\| - \|\vec{RM}\|}{\|\vec{GM}\| + \|\vec{RM}\|} + 1 \right) = \frac{\|\vec{GM}\|}{\|\vec{GM}\| + \|\vec{RM}\|}. \quad (S3)$$

### Appendix 4 The predictions of optical flow algorithms in each dataset.

To assess which datasets align better between optical flow algorithms and human responses, and which show greater discrepancies, we compare algorithm predictions with human responses and ground truth across datasets. Following the approach in Table 2, we calculated indices for each dataset separately and presented them in Tables S1–S12. Overall, the findings align with the trends in Table 2: biologically inspired models (e.g., FFV1MT, V1Attention-StageI) show stronger partial correlations with human responses, while multi-frame models like VideoFlow align more closely with ground truth in dynamic datasets.

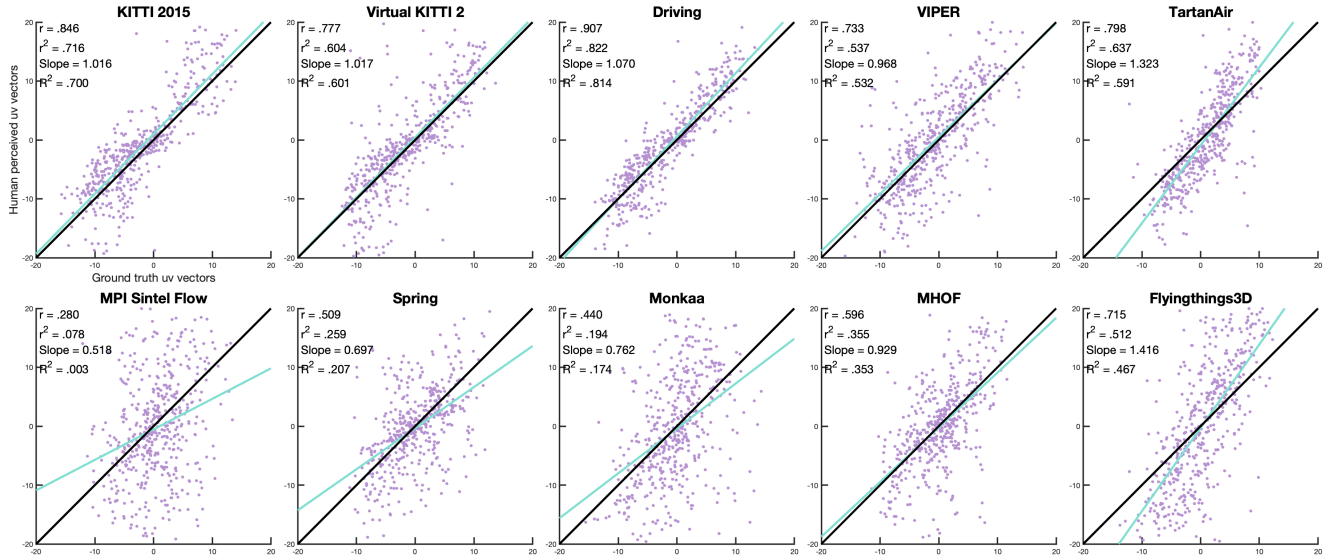

Figure S2. The scatter plots display the relationship between human-perceived UV vectors and ground truth UV vectors from each dataset. In the top-left corner, the Pearson correlation coefficient ( $r$ ), the squared correlation ( $r^2$ ), the slope of the linear regression line, and the coefficient of determination ( $R^2$ ) relative to the ideal response (i.e., the ground truth) are shown.

**Video S1 Demonstration of the procedure.** This video shows how observers use a mouse to control the direction and speed of circular Brownian noise to match the target motion. After each response, vectors indicating ground truth and observers' responses are displayed during practice trials.

**Video S2 Movies of human-perceived flows.** These videos display human-perceived flows across the image sequences used in the ten datasets. The video speed (5 Hz) is slower than the actual perceived speed (30Hz) to aid visualization

Table S1. Partial Correlation of  $uv$  vectors across Models and Datasets.

| Models / Datasets  | KITTI 2015    | Virtual KITTI 2 | Driving       | VIPER         | TartanAir     | MPI Sintel    | Spring        | Monkaa        | MHOF          | Flythings3D   | All Datasets  |
|--------------------|---------------|-----------------|---------------|---------------|---------------|---------------|---------------|---------------|---------------|---------------|---------------|
| Ground truth       | NaN           | NaN             | NaN           | NaN           | NaN           | NaN           | NaN           | NaN           | NaN           | NaN           | NaN           |
| Farnebäck          | 0.0635        | -0.0029         | 0.1029        | 0.1806        | 0.2684        | 0.1056        | 0.0440        | 0.0605        | 0.2838        | 0.1504        | 0.1670        |
| FFV1MT             | 0.2068        | <b>0.2308</b>   | <b>0.2246</b> | <b>0.3973</b> | 0.3350        | 0.1568        | <b>0.2839</b> | <b>0.2534</b> | <b>0.3670</b> | <b>0.3168</b> | <b>0.3063</b> |
| RAFT               | -0.0251       | 0.0957          | 0.1695        | 0.2817        | 0.1287        | 0.0815        | 0.1224        | 0.1632        | 0.2924        | 0.1480        | 0.1090        |
| FlowNet2           | 0.0003        | 0.0454          | 0.1514        | 0.2712        | 0.2071        | 0.0401        | 0.0235        | 0.1050        | 0.3020        | 0.1538        | 0.1012        |
| FlowFormer         | -0.0229       | 0.0112          | 0.2137        | 0.2811        | 0.0657        | 0.0597        | 0.0698        | 0.1375        | 0.2771        | 0.1153        | 0.0748        |
| VideoFlow          | 0.0079        | 0.0352          | 0.1798        | 0.2893        | 0.0582        | 0.1390        | -0.0014       | 0.2205        | 0.2945        | 0.0847        | 0.0784        |
| Perceiver IO       | 0.0402        | 0.0959          | 0.1373        | 0.3256        | 0.2104        | 0.0249        | -0.0719       | 0.0121        | 0.2875        | 0.1858        | 0.0860        |
| AGFlow             | 0.0581        | 0.1231          | 0.1954        | 0.2570        | 0.1030        | 0.0554        | 0.2545        | 0.1528        | 0.3603        | 0.1975        | 0.1589        |
| V1Attention-Stage1 | 0.0471        | -0.0588         | 0.1094        | 0.2835        | <b>0.3661</b> | 0.1646        | 0.1899        | 0.1802        | 0.3507        | 0.3052        | 0.2285        |
| DualModel          | <b>0.2677</b> | -0.0026         | 0.0578        | 0.2371        | 0.3457        | <b>0.1980</b> | 0.0016        | 0.1612        | 0.2495        | 0.2708        | 0.1973        |

Table S2. Partial Correlation of Direction across Models and Datasets.

| Models / Datasets  | KITTI 2015    | Virtual KITTI 2 | Driving       | VIPER         | TartanAir     | MPI Sintel    | Spring        | Monkaa        | MHOF          | Flythings3D   | All Datasets  |
|--------------------|---------------|-----------------|---------------|---------------|---------------|---------------|---------------|---------------|---------------|---------------|---------------|
| Ground truth       | NaN           | NaN             | NaN           | NaN           | NaN           | NaN           | NaN           | NaN           | NaN           | NaN           | NaN           |
| Farnebäck          | -0.0867       | 0.0625          | 0.0529        | 0.0245        | 0.0206        | 0.1323        | 0.1681        | 0.1537        | 0.3345        | 0.1414        | 0.1424        |
| FFV1MT             | 0.2775        | 0.4425          | 0.0464        | <b>0.4500</b> | 0.2075        | 0.1959        | <b>0.2863</b> | 0.1635        | 0.3175        | 0.2327        | 0.2756        |
| RAFT               | 0.2411        | 0.4133          | -0.0667       | 0.2428        | -0.0364       | -0.0532       | 0.1160        | 0.2310        | 0.3679        | <b>0.3528</b> | 0.2219        |
| FlowNet2           | <b>0.3628</b> | 0.4406          | 0.0527        | 0.1431        | 0.0625        | 0.1289        | 0.2039        | 0.2164        | <b>0.4359</b> | 0.2249        | 0.2600        |
| FlowFormer         | 0.0828        | 0.2904          | 0.1116        | 0.2819        | 0.0831        | -0.1337       | 0.1933        | 0.1942        | 0.2785        | 0.1884        | 0.1878        |
| VideoFlow          | 0.0644        | 0.2906          | 0.1597        | 0.2035        | 0.0403        | 0.0331        | 0.2285        | 0.2047        | 0.3675        | 0.2460        | 0.2188        |
| Perceiver IO       | -0.1114       | 0.2931          | 0.1857        | 0.0971        | -0.0912       | -0.0480       | 0.1029        | 0.1359        | 0.3593        | 0.2845        | 0.1698        |
| AGFlow             | 0.2389        | <b>0.4662</b>   | <b>0.2403</b> | 0.4238        | 0.0157        | 0.0935        | 0.0869        | 0.1815        | 0.2575        | 0.0952        | 0.2417        |
| V1Attention-Stage1 | 0.1863        | 0.3324          | 0.0216        | 0.3750        | <b>0.2954</b> | 0.1674        | 0.2747        | <b>0.2562</b> | 0.3980        | 0.2972        | <b>0.2845</b> |
| DualModel          | 0.3623        | 0.1425          | 0.0722        | 0.3110        | 0.2883        | <b>0.2721</b> | 0.1341        | 0.1630        | 0.3050        | 0.3391        | 0.2451        |

Table S3. Partial Correlation of Speed across Models and Datasets.

| Models / Datasets  | KITTI 2015    | Virtual KITTI 2 | Driving       | VIPER         | TartanAir     | MPI Sintel    | Spring        | Monkaa        | MHOF          | Flythings3D   | All Datasets  |
|--------------------|---------------|-----------------|---------------|---------------|---------------|---------------|---------------|---------------|---------------|---------------|---------------|
| Ground truth       | NaN           | NaN             | NaN           | NaN           | NaN           | NaN           | NaN           | NaN           | NaN           | NaN           | NaN           |
| Farnebäck          | 0.0768        | -0.0505         | 0.1221        | 0.0382        | 0.2171        | -0.0052       | -0.0321       | <b>0.0777</b> | 0.0314        | -0.0303       | 0.0410        |
| FFV1MT             | 0.0679        | -0.0050         | 0.0643        | 0.1513        | 0.2450        | 0.0194        | <b>0.1046</b> | -0.1823       | 0.0908        | 0.1341        | <b>0.0604</b> |
| RAFT               | -0.0024       | 0.2023          | 0.2298        | 0.0132        | 0.1562        | 0.0879        | 0.0092        | -0.0868       | 0.0503        | -0.0086       | 0.0128        |
| FlowNet2           | 0.0044        | 0.0446          | 0.2232        | 0.0373        | 0.3099        | 0.0367        | 0.0232        | -0.0058       | 0.0581        | -0.0007       | 0.0002        |
| FlowFormer         | -0.0322       | 0.0996          | <b>0.2542</b> | 0.0402        | 0.0029        | 0.0848        | -0.1446       | -0.0478       | 0.0382        | -0.0445       | -0.0232       |
| VideoFlow          | 0.0155        | 0.0997          | 0.2192        | -0.0130       | 0.0329        | <b>0.1594</b> | -0.1301       | -0.0887       | 0.0044        | -0.0379       | -0.0249       |
| Perceiver IO       | 0.1009        | <b>0.2050</b>   | 0.1456        | 0.0838        | 0.1999        | 0.1165        | 0.0281        | -0.0225       | 0.0755        | 0.0381        | 0.0296        |
| AGFlow             | 0.0026        | 0.1580          | 0.2288        | 0.0735        | 0.0872        | 0.0950        | 0.0750        | -0.1143       | 0.1255        | 0.1451        | 0.0139        |
| V1Attention-Stage1 | -0.0401       | -0.0801         | -0.0868       | <b>0.1769</b> | <b>0.3956</b> | -0.0274       | -0.0580       | -0.0360       | <b>0.1400</b> | 0.0870        | 0.0202        |
| DualModel          | <b>0.1981</b> | 0.1170          | 0.0436        | 0.0697        | 0.3298        | 0.0240        | -0.1591       | -0.1164       | 0.0561        | <b>0.1613</b> | 0.0589        |

Table S4. Response Consistent Index (RCI) across Models and Datasets. The RCI is introduced from [47] to represent the model's similarity to human perception (the larger, the more human-aligned).

| Models / Datasets  | KITTI 2015    | Virtual KITTI 2 | Driving       | VIPER         | TartanAir     | MPI Sintel    | Spring        | Monkaa        | MHOF          | Flythings3D   | All Datasets  |
|--------------------|---------------|-----------------|---------------|---------------|---------------|---------------|---------------|---------------|---------------|---------------|---------------|
| Ground truth       | NaN           | NaN             | NaN           | NaN           | NaN           | NaN           | NaN           | NaN           | NaN           | NaN           | NaN           |
| Farnebäck          | 0.0388        | 0.0725          | 0.0493        | 0.0764        | 0.0722        | 0.2515        | 0.1297        | 0.2342        | 0.1569        | 0.1973        | 0.1279        |
| FFV1MT             | 0.0706        | 0.0855          | 0.0553        | 0.1472        | 0.0697        | 0.2452        | 0.1749        | 0.2082        | 0.2274        | 0.2152        | 0.1499        |
| RAFT               | 0.0121        | 0.0275          | 0.0134        | 0.0250        | 0.0238        | 0.0645        | 0.0731        | 0.0593        | 0.1290        | 0.0480        | 0.0476        |
| FlowNet2           | 0.0250        | 0.0439          | 0.0190        | 0.0419        | 0.0322        | 0.1289        | 0.0793        | 0.0813        | 0.1544        | 0.0757        | 0.0682        |
| FlowFormer         | 0.0106        | 0.0308          | 0.0131        | 0.0258        | 0.0189        | 0.0414        | 0.0702        | 0.0605        | 0.1137        | 0.0390        | 0.0424        |
| VideoFlow          | 0.0128        | 0.0280          | 0.0118        | 0.0242        | 0.0151        | 0.0439        | 0.0553        | 0.0512        | 0.1108        | 0.0270        | 0.0380        |
| Perceiver IO       | 0.0233        | 0.0370          | 0.0162        | 0.0293        | 0.0306        | 0.0995        | 0.0629        | 0.0579        | 0.1305        | 0.0477        | 0.0535        |
| AGFlow             | 0.0498        | 0.0597          | 0.0326        | 0.0895        | 0.0439        | 0.1729        | 0.1359        | 0.1315        | 0.2226        | 0.1397        | 0.1078        |
| V1Attention-Stage1 | <b>0.0857</b> | <b>0.0927</b>   | <b>0.0747</b> | <b>0.1635</b> | <b>0.1530</b> | <b>0.3061</b> | <b>0.1870</b> | <b>0.2647</b> | <b>0.2379</b> | <b>0.2426</b> | <b>0.1808</b> |
| DualModel          | 0.0546        | 0.0692          | 0.0441        | 0.1011        | 0.0635        | 0.2226        | 0.1247        | 0.2065        | 0.2265        | 0.1576        | 0.1270        |

Table S5. Correlation of  $uv$  vectors across Models and Datasets (v.s. Human).

| Models / Datasets  | KITTI 2015    | Virtual KITTI 2 | Driving       | VIPER         | TartanAir     | MPI Sintel    | Spring        | Monkaa        | MHOF          | Flythings3D   | All Datasets  |
|--------------------|---------------|-----------------|---------------|---------------|---------------|---------------|---------------|---------------|---------------|---------------|---------------|
| Ground truth       | 0.8461        | 0.7769          | 0.9068        | 0.7330        | 0.7979        | 0.2802        | 0.5089        | 0.4403        | 0.5962        | 0.7154        | 0.6605        |
| Farneback          | 0.7894        | 0.6119          | 0.7424        | 0.6813        | 0.7861        | 0.2267        | 0.3610        | 0.2925        | 0.5689        | 0.4227        | 0.5394        |
| FFV1MT             | 0.7976        | 0.7518          | 0.8447        | 0.7343        | <b>0.8155</b> | 0.2620        | <b>0.5330</b> | 0.4472        | 0.5622        | 0.5838        | 0.6263        |
| RAFT               | 0.8431        | <b>0.7614</b>   | 0.9069        | 0.7576        | 0.8006        | 0.2902        | 0.5098        | 0.4641        | 0.6217        | 0.7086        | 0.6425        |
| FlowNet2           | 0.8321        | 0.7470          | 0.8999        | 0.7526        | 0.8075        | 0.2083        | 0.4359        | 0.3674        | 0.6166        | 0.6621        | 0.5851        |
| FlowFormer         | 0.8436        | 0.7276          | 0.9068        | 0.7576        | 0.7948        | 0.2857        | 0.4971        | 0.4564        | 0.6233        | 0.7046        | 0.6362        |
| VideoFlow          | 0.8428        | 0.7466          | <b>0.9098</b> | 0.7587        | 0.7934        | 0.3030        | 0.4938        | <b>0.4786</b> | <b>0.6261</b> | <b>0.7158</b> | <b>0.6427</b> |
| Perceiver IO       | 0.8393        | 0.7500          | 0.8975        | <b>0.7652</b> | 0.8002        | 0.2423        | 0.4361        | 0.4029        | 0.6110        | 0.7031        | 0.6188        |
| AGFlow             | 0.7717        | 0.7237          | 0.9000        | 0.7227        | 0.7854        | 0.2033        | 0.5159        | 0.3310        | 0.5320        | 0.5178        | 0.5372        |
| V1Attention-Stage1 | 0.7036        | 0.6271          | 0.6877        | 0.6462        | 0.7523        | 0.2434        | 0.4364        | 0.3676        | 0.5930        | 0.5809        | 0.5478        |
| DualModel          | <b>0.8507</b> | 0.6638          | 0.6501        | 0.7127        | 0.8146        | <b>0.3046</b> | 0.3369        | 0.3660        | 0.5025        | 0.6204        | 0.5704        |

Table S6. Correlation of Direction across Models and Datasets (v.s. Human).

| Models / Datasets  | KITTI 2015    | Virtual KITTI 2 | Driving       | VIPER         | TartanAir     | MPI Sintel    | Spring        | Monkaa        | MHOF          | Flythings3D   | All Datasets  |
|--------------------|---------------|-----------------|---------------|---------------|---------------|---------------|---------------|---------------|---------------|---------------|---------------|
| Ground truth       | 0.5358        | 0.4939          | 0.4850        | 0.4927        | 0.4856        | 0.1962        | 0.3040        | 0.1912        | 0.2899        | 0.6483        | 0.4286        |
| Farneback          | 0.4220        | 0.3683          | 0.3635        | 0.4151        | 0.4386        | 0.2057        | 0.3112        | 0.2327        | 0.4141        | 0.3728        | 0.3762        |
| FFV1MT             | 0.4746        | 0.6095          | 0.4577        | 0.5869        | 0.5179        | 0.2560        | <b>0.4017</b> | 0.2348        | 0.3542        | 0.4515        | 0.4534        |
| RAFT               | 0.5693        | 0.6105          | 0.4429        | 0.5359        | 0.4675        | 0.1451        | 0.3079        | 0.2865        | 0.4508        | <b>0.7017</b> | 0.4694        |
| FlowNet2           | 0.6136        | 0.6243          | 0.4744        | 0.4983        | 0.4794        | 0.2266        | 0.3522        | 0.2848        | <b>0.5079</b> | 0.6314        | <b>0.4841</b> |
| FlowFormer         | 0.5223        | 0.5404          | 0.4943        | 0.5434        | 0.4796        | 0.1484        | 0.3552        | 0.2682        | 0.3847        | 0.6523        | 0.4560        |
| VideoFlow          | 0.5127        | 0.5486          | 0.5038        | 0.5234        | 0.4750        | 0.1980        | 0.3567        | 0.2712        | 0.4488        | 0.6738        | 0.4711        |
| Perceiver IO       | 0.4872        | 0.5476          | 0.4991        | 0.4947        | 0.4387        | 0.1059        | 0.2996        | 0.2329        | 0.4482        | 0.6628        | 0.4400        |
| AGFlow             | 0.5188        | <b>0.6348</b>   | <b>0.5286</b> | <b>0.5961</b> | 0.4577        | 0.1830        | 0.2410        | 0.2555        | 0.2924        | 0.5326        | 0.4468        |
| V1Attention-Stage1 | 0.4620        | 0.5392          | 0.3376        | 0.5549        | 0.5334        | 0.2124        | 0.3851        | <b>0.3048</b> | 0.4459        | 0.5100        | 0.4473        |
| DualModel          | <b>0.6169</b> | 0.4556          | 0.4106        | 0.5497        | <b>0.5466</b> | <b>0.3281</b> | 0.2775        | 0.2420        | 0.3833        | 0.5656        | 0.4510        |

Table S7. Correlation of Speed across Models and Datasets (v.s. Human).

| Models/Datasets    | KITTI 2015    | Virtual KITTI 2 | Driving       | VIPER         | TartanAir     | MPI Sintel    | Spring        | Monkaa        | MHOF          | Flythings3D   | All Datasets  |
|--------------------|---------------|-----------------|---------------|---------------|---------------|---------------|---------------|---------------|---------------|---------------|---------------|
| Ground truth       | 0.3432        | 0.3674          | 0.5136        | 0.2869        | 0.5685        | 0.2559        | 0.3954        | 0.0888        | 0.3622        | 0.2659        | 0.2876        |
| Farneback          | 0.2860        | 0.1420          | 0.3264        | 0.1726        | 0.5013        | 0.0753        | 0.1426        | <b>0.0961</b> | 0.2261        | 0.0169        | 0.1476        |
| FFV1MT             | 0.2687        | 0.2547          | 0.4008        | 0.2797        | 0.5750        | 0.1321        | 0.2992        | -0.1305       | 0.2161        | 0.2205        | 0.2033        |
| RAFT               | 0.3383        | 0.4113          | 0.5500        | 0.2627        | 0.5799        | 0.2627        | 0.3561        | 0.0263        | <b>0.3145</b> | 0.2274        | <b>0.2337</b> |
| FlowNet2           | 0.3177        | 0.3348          | 0.5441        | 0.2677        | <b>0.6215</b> | 0.1811        | 0.3303        | 0.0203        | 0.2728        | 0.1495        | 0.1760        |
| FlowFormer         | 0.3350        | 0.3562          | <b>0.5547</b> | 0.2709        | 0.5422        | 0.2673        | 0.2911        | 0.0439        | 0.2964        | 0.2041        | 0.2133        |
| VideoFlow          | 0.3396        | 0.3732          | 0.5444        | 0.2599        | 0.5464        | <b>0.2949</b> | 0.3314        | 0.0385        | 0.2639        | 0.2434        | 0.2186        |
| Perceiver IO       | 0.3552        | <b>0.4115</b>   | 0.5254        | <b>0.2947</b> | 0.5796        | 0.2687        | <b>0.3581</b> | 0.0492        | 0.2961        | 0.2365        | 0.2327        |
| AGFlow             | 0.2167        | 0.3680          | 0.5438        | 0.2360        | 0.5280        | 0.2119        | 0.2130        | -0.0811       | 0.2048        | 0.2010        | 0.1452        |
| V1Attention-Stage1 | 0.1407        | 0.1624          | 0.1529        | 0.2742        | 0.5649        | 0.0522        | 0.1148        | -0.0085       | 0.2860        | 0.1539        | 0.1381        |
| DualModel          | <b>0.3885</b> | 0.3271          | 0.3070        | 0.2232        | 0.6132        | 0.1480        | 0.0793        | -0.0746       | 0.1697        | <b>0.2671</b> | 0.2000        |

Table S8. End-Point Error (v.s. Human).

| Models/Datasets    | KITTI 2015    | Virtual KITTI 2 | Driving       | VIPER         | TartanAir     | MPI Sintel    | Spring        | Monkaa        | MHOF          | Flythings3D   | All Datasets  |
|--------------------|---------------|-----------------|---------------|---------------|---------------|---------------|---------------|---------------|---------------|---------------|---------------|
| Ground truth       | 5.1482        | 5.5497          | 3.8906        | 6.4759        | 5.8027        | 10.3036       | 6.7171        | 9.7504        | 6.7639        | 9.2317        | 6.9634        |
| Farneback          | 5.5556        | 6.3728          | 5.4047        | 6.3994        | 5.2625        | 8.2336        | 9.0176        | 7.5378        | 5.7985        | 9.5553        | 6.9138        |
| FFV1MT             | 5.3739        | <b>5.5053</b>   | 4.3577        | <b>6.1055</b> | 5.5255        | 9.5621        | 7.3843        | 8.3927        | 5.2278        | 8.3308        | 6.5766        |
| RAFT               | 5.1886        | 5.6502          | 3.8650        | 6.2569        | 5.6337        | 10.1466       | 12.3883       | 9.4856        | 5.9235        | 9.1406        | 7.3679        |
| FlowNet2           | 5.2660        | 5.6927          | 3.9814        | 6.1794        | 5.4872        | 11.0885       | 12.3818       | 10.2964       | 5.6786        | 9.4780        | 7.5530        |
| FlowFormer         | 5.1739        | 5.8828          | 3.8653        | 6.2027        | 5.7910        | 10.3444       | 12.2990       | 9.4048        | 6.0709        | 9.2916        | 7.4326        |
| VideoFlow          | 5.1594        | 5.8054          | <b>3.8246</b> | 6.3017        | 5.8205        | 10.2044       | 12.6882       | 9.4029        | 6.2865        | 9.2238        | 7.4717        |
| Perceiver IO       | 5.2073        | 5.7400          | 4.2661        | 6.5664        | 5.7617        | 10.4737       | 13.1479       | 10.1592       | 6.1923        | 10.0008       | 7.7515        |
| AGFlow             | 5.2642        | 6.0433          | 3.9644        | 6.8273        | 5.9579        | 13.3879       | 9.2022        | 13.1371       | 5.6402        | 9.9727        | 7.9397        |
| V1Attention-Stage1 | 6.1725        | 6.1028          | 5.9365        | 6.4236        | <b>4.7982</b> | <b>8.0337</b> | <b>6.4705</b> | <b>7.4639</b> | <b>4.5903</b> | <b>7.6485</b> | <b>6.3640</b> |
| DualModel          | <b>5.0696</b> | 6.1217          | 6.2542        | 6.5805        | 5.7466        | 9.9290        | 9.8038        | 8.6702        | 5.2384        | 9.6581        | 7.3072        |

Table S9. Correlation of  $uv$  vectors across Models and Datasets (v.s. GT).

| Models/Datasets    | KITTI 2015    | Virtual KITTI 2 | Driving       | VIPER         | TartanAir     | MPI Sintel    | Spring        | Monkaa        | MHOF          | Flythings3D   | All Datasets  |
|--------------------|---------------|-----------------|---------------|---------------|---------------|---------------|---------------|---------------|---------------|---------------|---------------|
| Ground Truth       | 1.0000        | 1.0000          | 1.0000        | 1.0000        | 1.0000        | 1.0000        | 1.0000        | 1.0000        | 1.0000        | 1.0000        | 1.0000        |
| Farneback          | 0.9170        | 0.7890          | 0.7893        | 0.8381        | 0.8947        | 0.4947        | 0.6531        | 0.5624        | 0.6709        | 0.4604        | 0.6769        |
| FFV1MT             | 0.8811        | 0.8783          | 0.8824        | 0.7637        | 0.9273        | 0.4576        | 0.7085        | 0.6038        | 0.5213        | 0.5596        | 0.6994        |
| RAFT               | 0.9975        | <b>0.9577</b>   | 0.9878        | 0.9689        | <b>0.9890</b> | 0.9424        | 0.9214        | 0.9500        | 0.8141        | 0.9420        | 0.9259        |
| FlowNet2           | 0.9834        | 0.9499          | 0.9775        | 0.9429        | 0.9852        | 0.6377        | 0.8346        | 0.6767        | 0.7793        | 0.8453        | 0.8201        |
| FlowFormer         | <b>0.9980</b> | 0.9332          | 0.9804        | 0.9672        | 0.9887        | 0.9701        | 0.9350        | 0.9437        | <b>0.8473</b> | 0.9496        | 0.9325        |
| VideoFlow          | 0.9956        | 0.9522          | <b>0.9949</b> | <b>0.9723</b> | 0.9874        | <b>0.9745</b> | <b>0.9710</b> | <b>0.9580</b> | 0.8274        | <b>0.9877</b> | <b>0.9437</b> |
| Perceiver IO       | 0.9880        | 0.9385          | 0.9757        | 0.9671        | 0.9564        | 0.8155        | 0.9080        | 0.9045        | 0.7848        | 0.9060        | 0.8929        |
| AGFlow             | 0.8958        | 0.8852          | 0.9707        | 0.8672        | 0.9634        | 0.5697        | 0.7112        | 0.4780        | 0.4621        | 0.5647        | 0.6811        |
| V1Attention-Stage1 | 0.8143        | 0.8335          | 0.7233        | 0.6915        | 0.7646        | 0.3377        | 0.6009        | 0.5214        | 0.6265        | 0.5663        | 0.6270        |
| DualModel          | 0.9560        | 0.8555          | 0.6976        | 0.8601        | 0.9166        | 0.4997        | 0.6599        | 0.5585        | 0.5659        | 0.6710        | 0.7045        |

Table S10. Correlation of direction across Models and Datasets (v.s. GT).

| Models/Datasets    | KITTI 2015    | Virtual KITTI 2 | Driving       | VIPER         | TartanAir     | MPI Sintel    | Spring        | Monkaa        | MHOF          | Flythings3D   | All Datasets  |
|--------------------|---------------|-----------------|---------------|---------------|---------------|---------------|---------------|---------------|---------------|---------------|---------------|
| Ground Truth       | 1.0000        | 1.0000          | 1.0000        | 1.0000        | 1.0000        | 1.0000        | 1.0000        | 1.0000        | 1.0000        | 1.0000        | 1.0000        |
| Farneback          | 0.8578        | 0.6635          | 0.6795        | 0.8176        | 0.8859        | 0.4613        | 0.6039        | 0.5672        | 0.4334        | 0.4246        | 0.6497        |
| FFV1MT             | 0.5095        | 0.6277          | 0.9088        | 0.5053        | 0.9516        | 0.4131        | 0.6109        | 0.5022        | 0.1931        | 0.4528        | 0.5882        |
| RAFT               | 0.8877        | 0.7907          | 0.9505        | 0.9090        | <b>0.9768</b> | 0.8702        | 0.7902        | 0.8207        | 0.5113        | 0.9218        | 0.8455        |
| FlowNet2           | 0.8091        | <b>0.8201</b>   | 0.9478        | 0.9024        | 0.9532        | 0.6869        | 0.7066        | 0.7286        | <b>0.5858</b> | 0.8244        | 0.8022        |
| FlowFormer         | 0.9254        | 0.7648          | 0.9709        | <b>0.9547</b> | 0.9343        | 0.9547        | 0.8699        | 0.7850        | 0.5749        | 0.9190        | 0.8663        |
| VideoFlow          | 0.9162        | 0.8127          | <b>0.9759</b> | 0.9317        | 0.9570        | <b>0.9674</b> | <b>0.9502</b> | <b>0.8264</b> | 0.4912        | <b>0.9745</b> | <b>0.8804</b> |
| Perceiver IO       | <b>0.9590</b> | 0.7970          | 0.8558        | 0.9510        | 0.9531        | 0.7089        | 0.7865        | 0.7916        | 0.5788        | 0.8422        | 0.8237        |
| AGFlow             | 0.6989        | 0.6953          | 0.9185        | 0.6266        | 0.9323        | 0.5386        | 0.5687        | 0.5719        | 0.1709        | 0.7473        | 0.6595        |
| V1Attention-Stage1 | 0.6356        | 0.6443          | 0.6671        | 0.5927        | 0.7415        | 0.2787        | 0.5446        | 0.3750        | 0.2747        | 0.4807        | 0.5384        |
| DualModel          | 0.8732        | 0.7592          | 0.7622        | 0.7564        | 0.8663        | 0.4785        | 0.5667        | 0.5900        | 0.3989        | 0.5364        | 0.6676        |

Table S11. Correlation of Speed across Models and Datasets (v.s. GT).

| Models/Datasets    | KITTI 2015    | Virtual KITTI 2 | Driving       | VIPER         | TartanAir     | MPI Sintel    | Spring        | Monkaa        | MHOF          | Flythings3D   | All Datasets  |
|--------------------|---------------|-----------------|---------------|---------------|---------------|---------------|---------------|---------------|---------------|---------------|---------------|
| Ground Truth       | 1.0000        | 1.0000          | 1.0000        | 1.0000        | 1.0000        | 1.0000        | 1.0000        | 1.0000        | 1.0000        | 1.0000        | 1.0000        |
| Farneback          | 0.6792        | 0.4975          | 0.4538        | 0.4901        | 0.6405        | 0.3128        | 0.4281        | 0.2353        | 0.5572        | 0.1720        | 0.3874        |
| FFV1MT             | 0.6401        | 0.7025          | 0.7040        | 0.5543        | 0.7976        | 0.4508        | 0.5546        | 0.4023        | 0.3805        | 0.3798        | 0.5374        |
| RAFT               | 0.9867        | <b>0.9251</b>   | 0.9257        | 0.8959        | 0.9486        | 0.8532        | 0.8910        | 0.8337        | <b>0.7886</b> | 0.8707        | 0.7865        |
| FlowNet2           | 0.9211        | 0.8525          | 0.8875        | 0.8719        | 0.9390        | 0.5962        | 0.8033        | 0.2909        | 0.6382        | 0.5644        | 0.6113        |
| FlowFormer         | <b>0.9892</b> | 0.8283          | 0.9574        | 0.8804        | <b>0.9526</b> | 0.9162        | 0.8897        | 0.8095        | 0.7537        | 0.8523        | 0.7890        |
| VideoFlow          | 0.9814        | 0.9133          | <b>0.9679</b> | <b>0.9224</b> | 0.9458        | <b>0.9277</b> | <b>0.9407</b> | <b>0.8887</b> | 0.7207        | <b>0.9560</b> | <b>0.8088</b> |
| Perceiver IO       | 0.9432        | 0.8330          | 0.9403        | 0.9127        | 0.8847        | 0.7684        | 0.8742        | 0.7270        | 0.6739        | 0.8083        | 0.7435        |
| AGFlow             | 0.6258        | 0.7275          | 0.8710        | 0.6326        | 0.8656        | 0.5217        | 0.3775        | 0.3071        | 0.2527        | 0.2461        | 0.4640        |
| V1Attention-Stage1 | 0.5048        | 0.6036          | 0.4286        | 0.4192        | 0.4968        | 0.3028        | 0.4131        | 0.2899        | 0.4719        | 0.2754        | 0.4192        |
| DualModel          | 0.8283        | 0.6707          | 0.5363        | 0.5897        | 0.7798        | 0.5001        | 0.5170        | 0.3714        | 0.3324        | 0.4971        | 0.5288        |

Table S12. End-Point Error (v.s. GT).

| Models/Datasets    | KITTI 2015    | Virtual KITTI 2 | Driving       | VIPER         | TartanAir     | MPI Sintel    | Spring        | Monkaa        | MHOF          | Flythings3D   | All Datasets  |
|--------------------|---------------|-----------------|---------------|---------------|---------------|---------------|---------------|---------------|---------------|---------------|---------------|
| Ground truth       | 0.0000        | 0.0000          | 0.0000        | 0.0000        | 0.0000        | 0.0000        | 0.0000        | 0.0000        | 0.0000        | 0.0000        | 0.0000        |
| Farneback          | 2.3448        | 4.3035          | 4.0169        | 3.3315        | 2.2899        | 8.0080        | 7.3517        | 7.7063        | 5.2443        | 10.5800       | 5.5177        |
| FFV1MT             | 3.3863        | 3.5651          | 2.9159        | 5.6433        | 2.3130        | 9.3565        | 6.8494        | 7.7386        | 7.0360        | 9.6041        | 5.8408        |
| RAFT               | 0.4900        | <b>1.1488</b>   | 0.5472        | 0.8620        | 0.6431        | 2.1057        | 8.1461        | 2.0466        | 3.8601        | 2.0892        | 2.1939        |
| FlowNet2           | 1.1011        | 1.8750          | 0.9257        | 1.4860        | 0.7700        | 5.8037        | 8.4985        | 3.7901        | 4.4807        | 3.7035        | 3.2434        |
| FlowFormer         | <b>0.4159</b> | 1.6521          | 0.5475        | 0.8451        | 0.6086        | 1.4738        | 7.9602        | 1.9914        | <b>3.5032</b> | 1.7794        | 2.0777        |
| VideoFlow          | 0.4811        | 1.3266          | <b>0.4025</b> | <b>0.7785</b> | <b>0.5140</b> | <b>1.4016</b> | 7.7573        | <b>1.7247</b> | 3.6526        | <b>1.0431</b> | <b>1.9082</b> |
| Perceiver IO       | 0.9487        | 1.7568          | 1.0664        | 1.2783        | 1.0709        | 4.0563        | 8.5428        | 2.7422        | 4.1413        | 3.0831        | 2.8687        |
| AGFlow             | 2.1481        | 2.9862          | 1.3214        | 4.0459        | 1.6407        | 10.2528       | 7.7348        | 9.6162        | 7.3885        | 7.2425        | 5.4377        |
| V1Attention-Stage1 | 4.9537        | 4.9182          | 5.9380        | 6.8169        | 5.0388        | 10.1230       | <b>6.5684</b> | 8.8315        | 6.4919        | 10.3447       | 7.0025        |
| DualModel          | 2.2578        | 3.7184          | 4.5595        | 4.3126        | 2.3973        | 8.8834        | 7.8088        | 7.6007        | 6.7577        | 8.2937        | 5.6590        |
